# Supplementary material for: Identification and quantification of local antiaromaticity in polycyclic aromatic hydrocarbons (PAHs) based on the magnetic criterion
Source: Royal Society of Chemistry journal article supplement (doi:10.1039/d4ob00114a), 2024-01-01

1:

## Identification and Quantification of Local Antiaromaticity in Polycyclic Aromatic Hydrocarbons (PAHs) on the magnetic criterion.

**Erich Kleinpeter\* and Andreas Koch**

*Universität Potsdam, Institut für Chemie, Karl-Liebknecht-Str. 24-25, D-14476 Potsdam(Golm), Germany*

Corresponding author: Erich Kleinpeter, Phone +49-331-977-5210; Fax +49-331-977-5064;

E-mail: ekleinp@uni-potsdam.de

### *Supporting Information*

**Schemes:** Compounds studied ..... S2

**Figures:** Spatial magnetic properties (TSNMRS) of the studied compounds [top and side view(s)] by different ICSS of  $-0.5$  ppm (*orange*),  $-0.1$  ppm (red) *deshielding* and 5 ppm (blue), 2 ppm (cyan), 0.5 ppm (green) and 0.1 ppm (yellow) *shielding* ..... S3 – S19

# 2:

## Compounds studied:

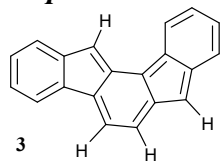

**indeno[1,2-a]fluorene**

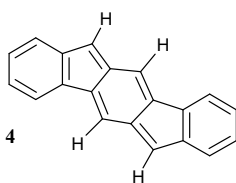

**indeno[1,2-b]fluorene**

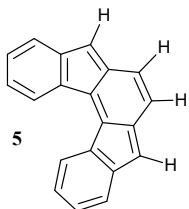

**indeno[1,2-c]fluorene**

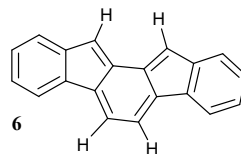

**indeno[2,1-a]fluorene**

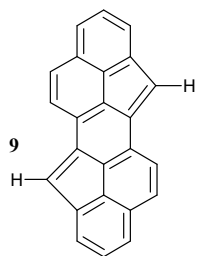

**cyclopenta[qr]indeno[2,1,7-ijk]tetraphen**

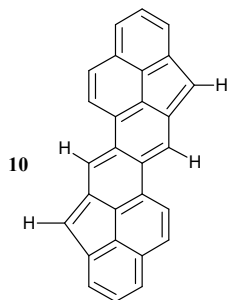

**cyclopenta[qr]indeno[7,2,1-cde]picene**

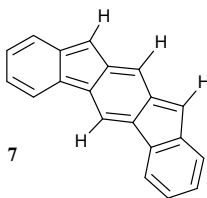

**indeno[2,1-b]fluorene**

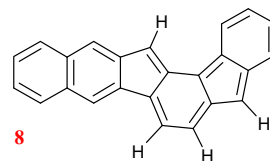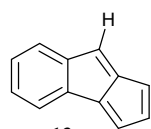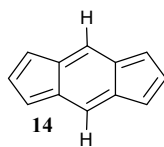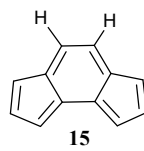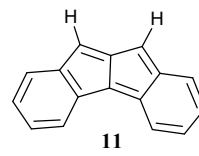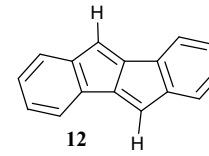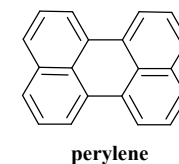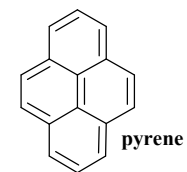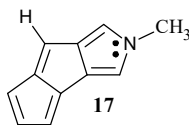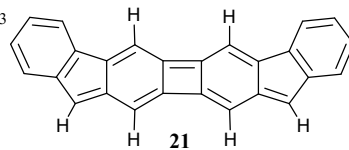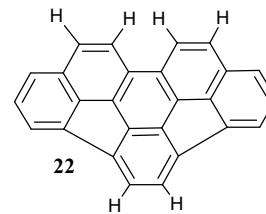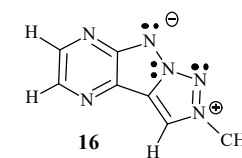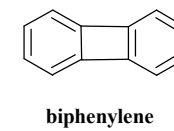

3:

**Figure S1.** Spatial magnetic properties (TSNMRS) of the studied compounds [top and side view(s)] by different ICSS of  $-0.5$  ppm (*orange*),  $-0.1$  ppm (*red*) *deshielding* and  $5$  ppm (*blue*),  $2$  ppm (*cyan*),  $0.5$  ppm (*green*) and  $0.1$  ppm (*yellow*) *shielding*.

3

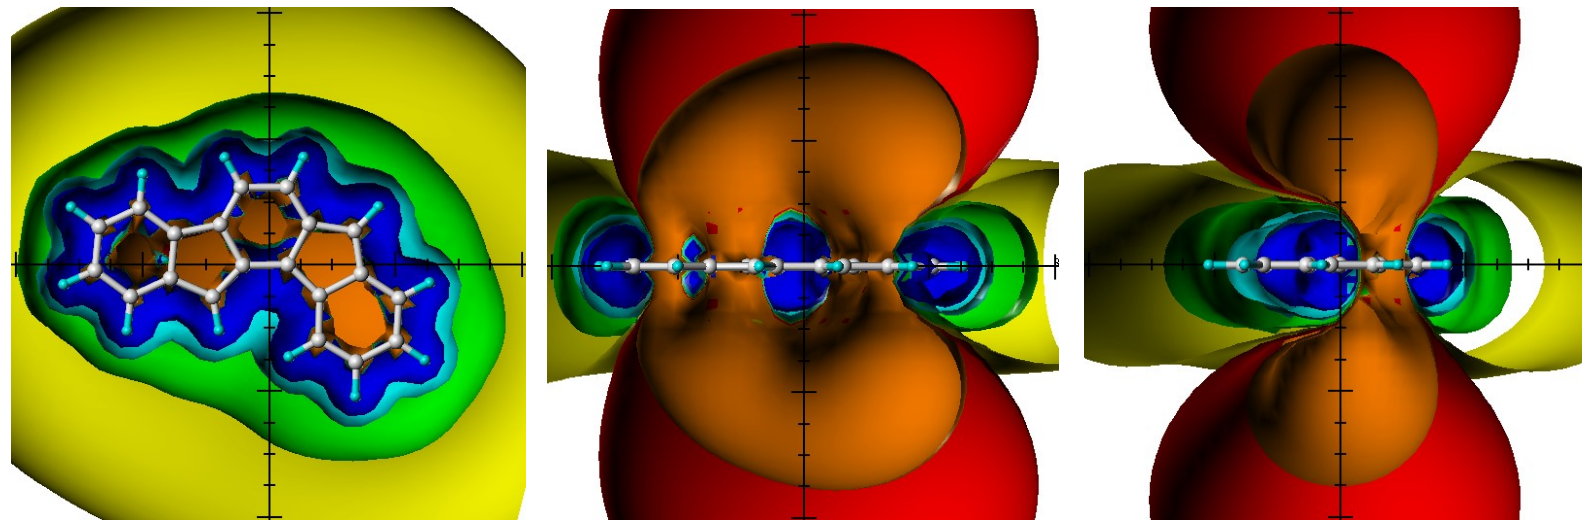

4

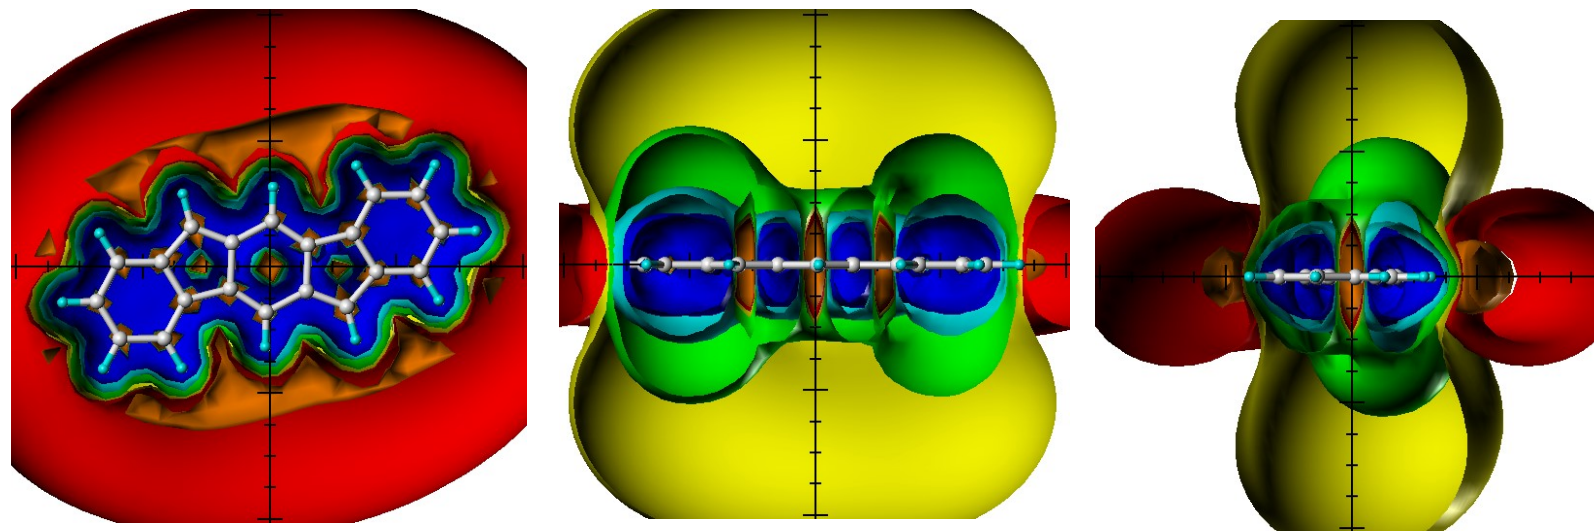

4:

5

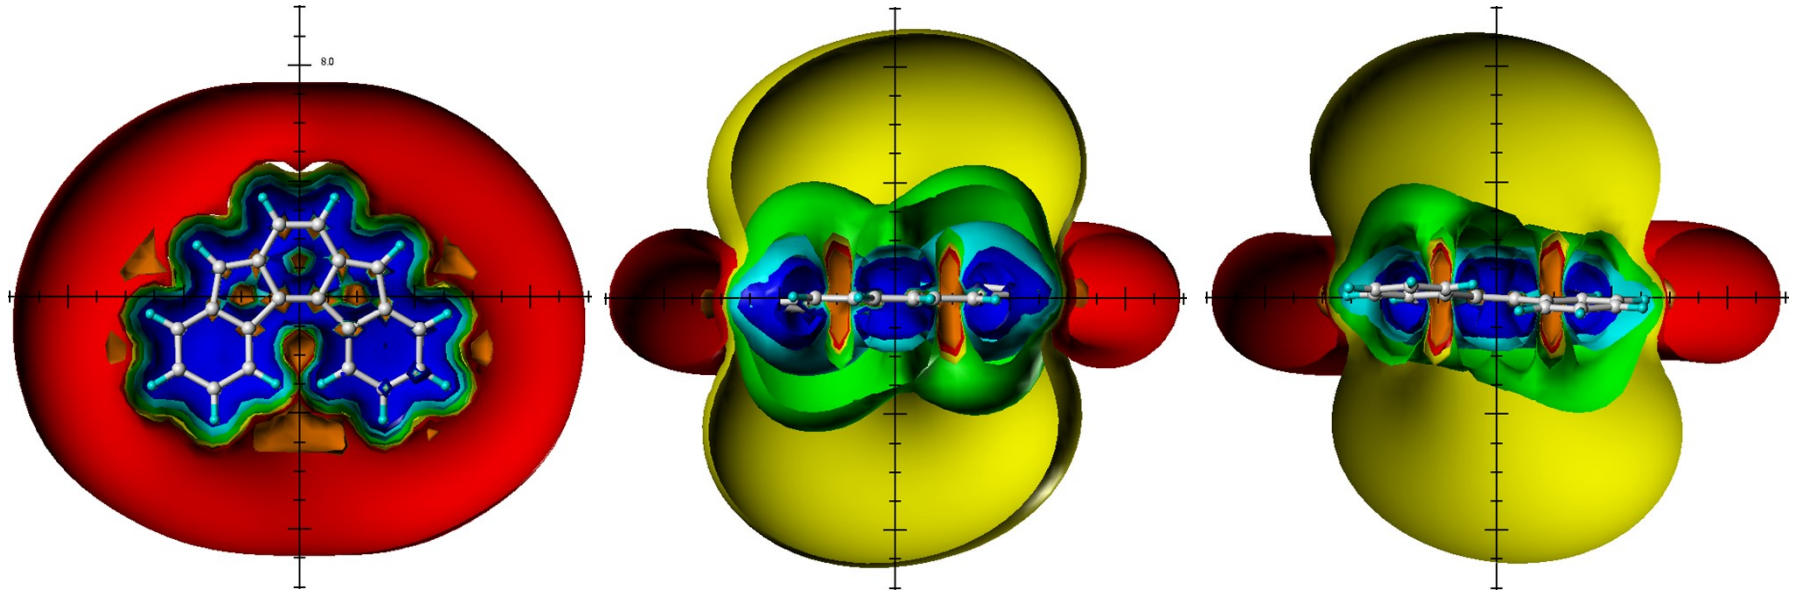

5:

6

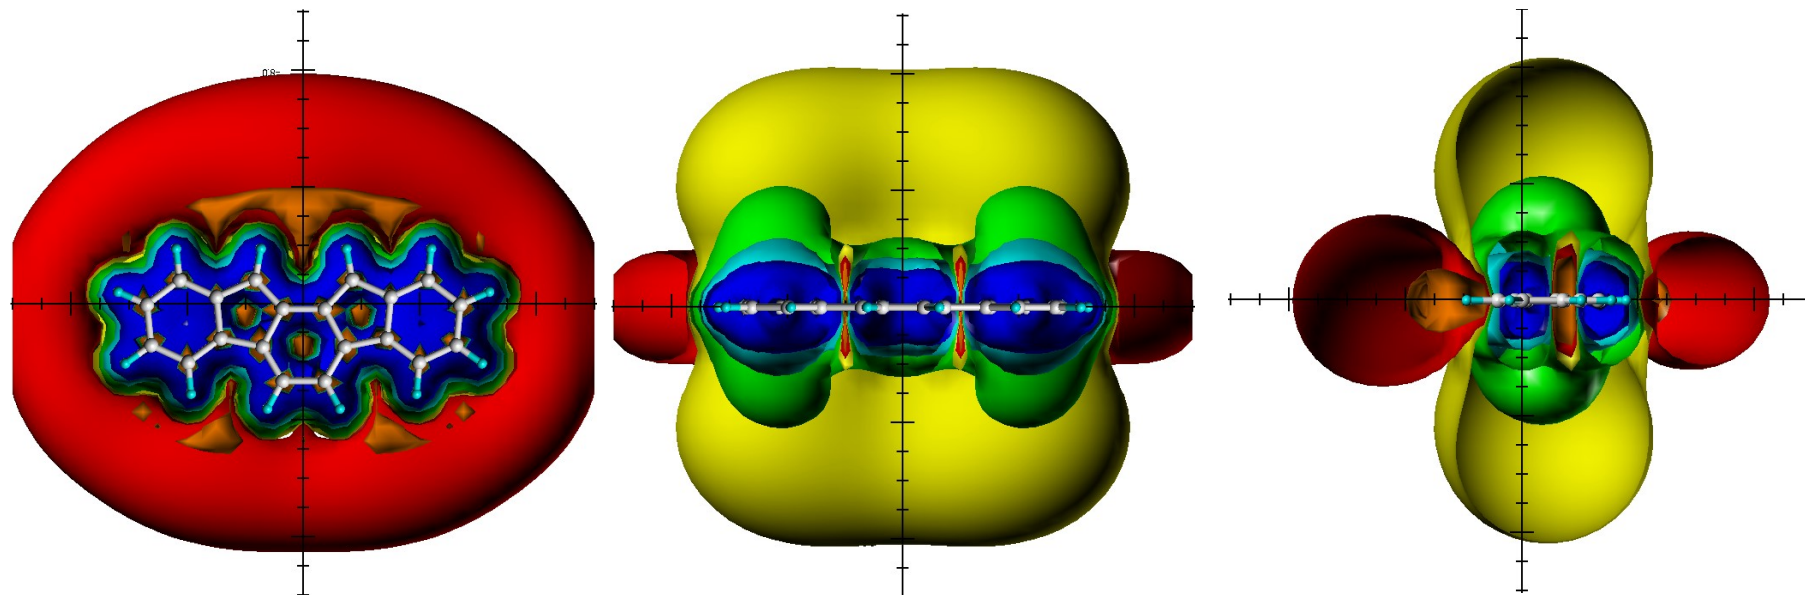

7

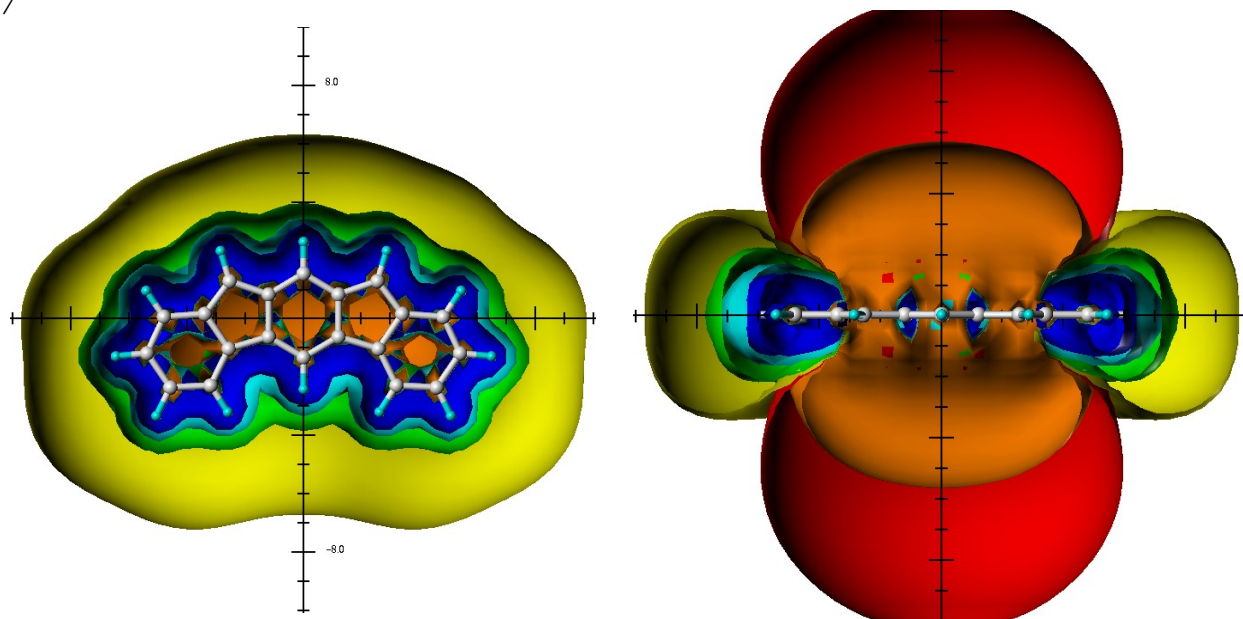



6:

8

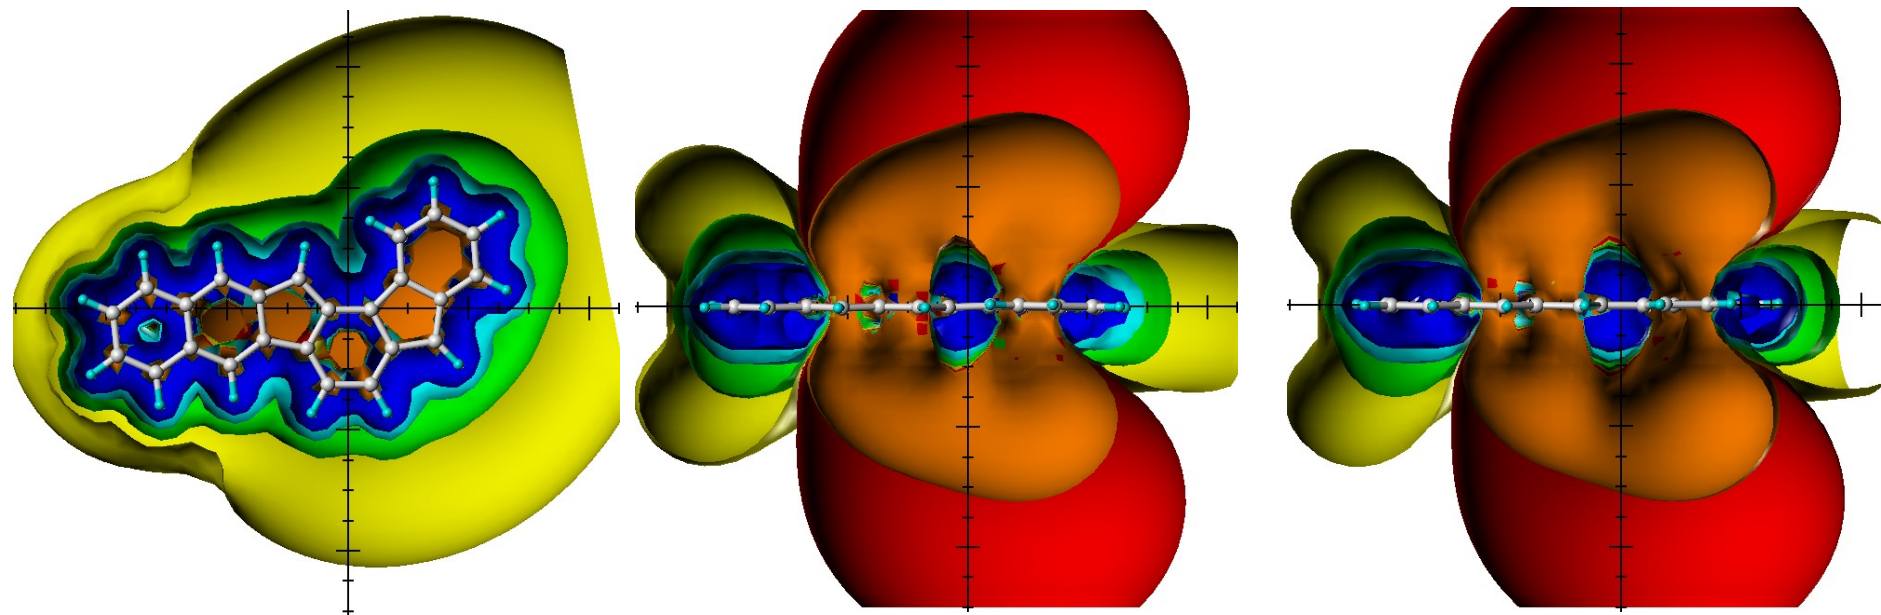

7:

9

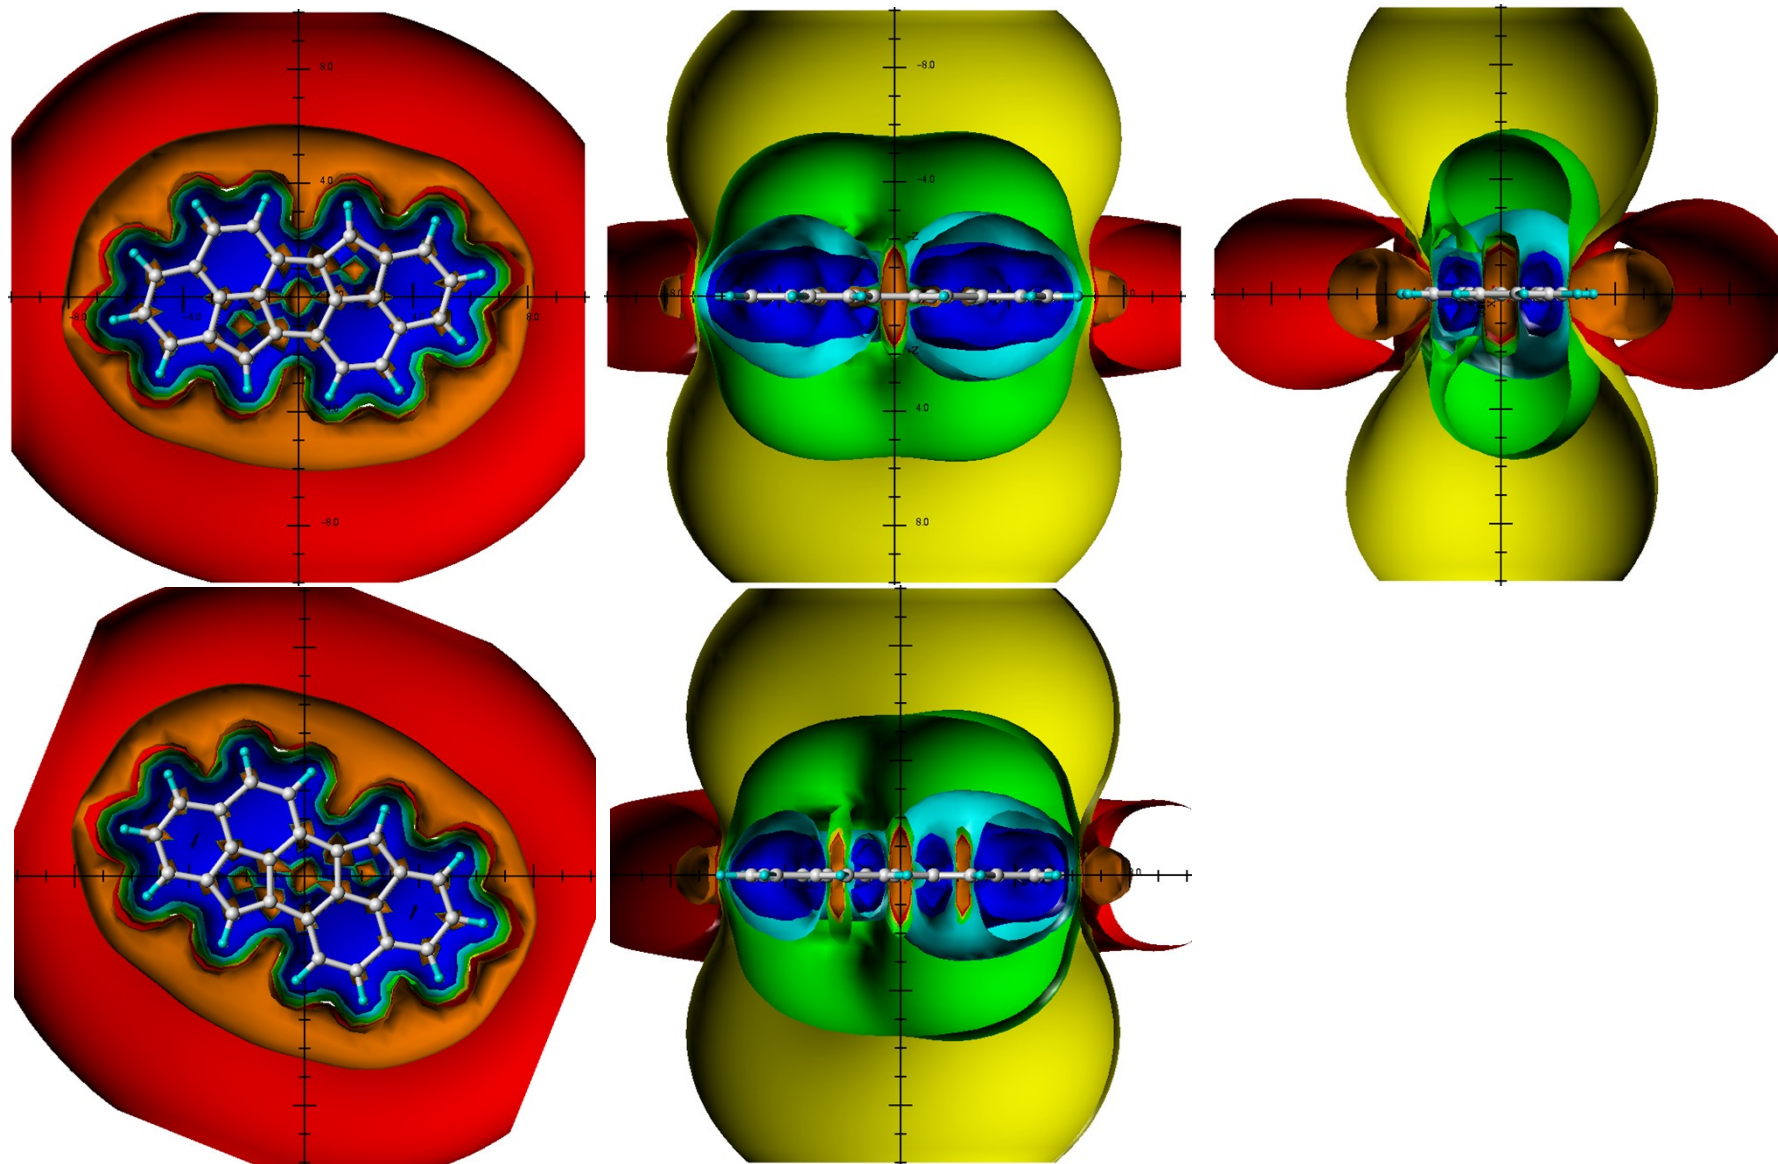

8:

10

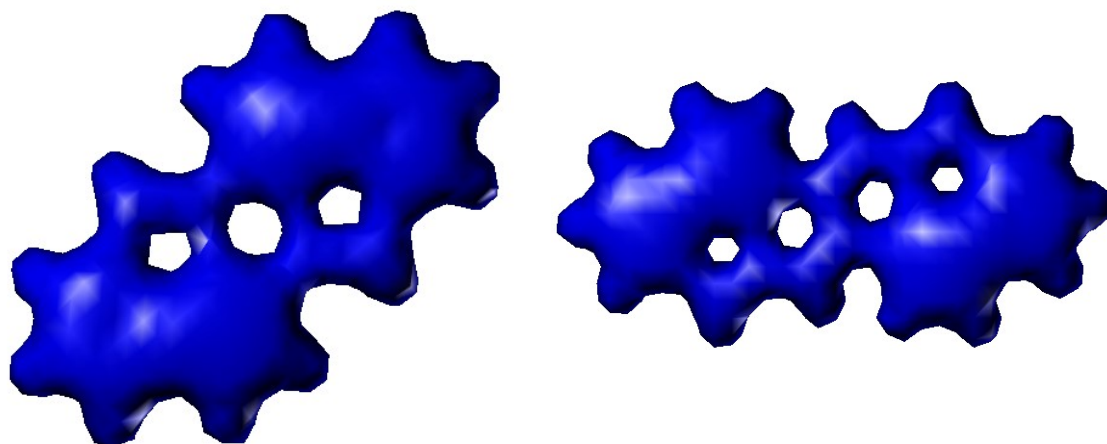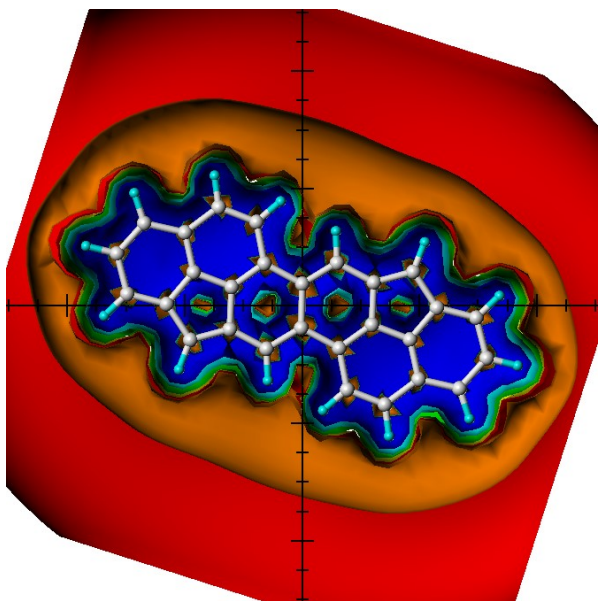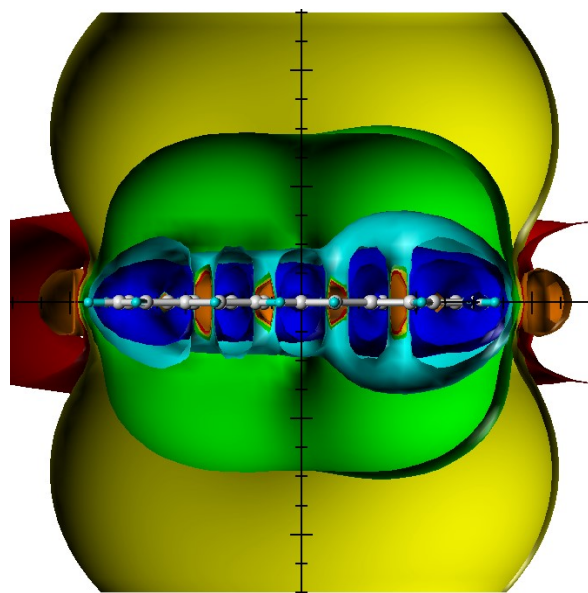



9:

11

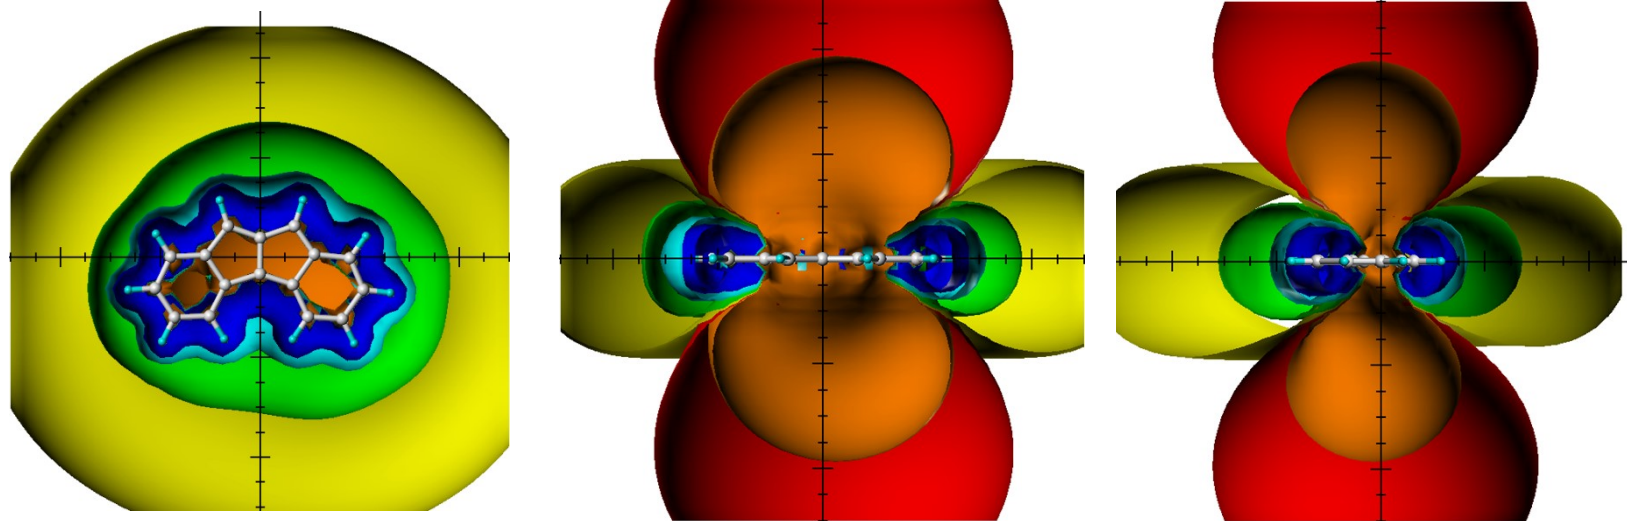

12

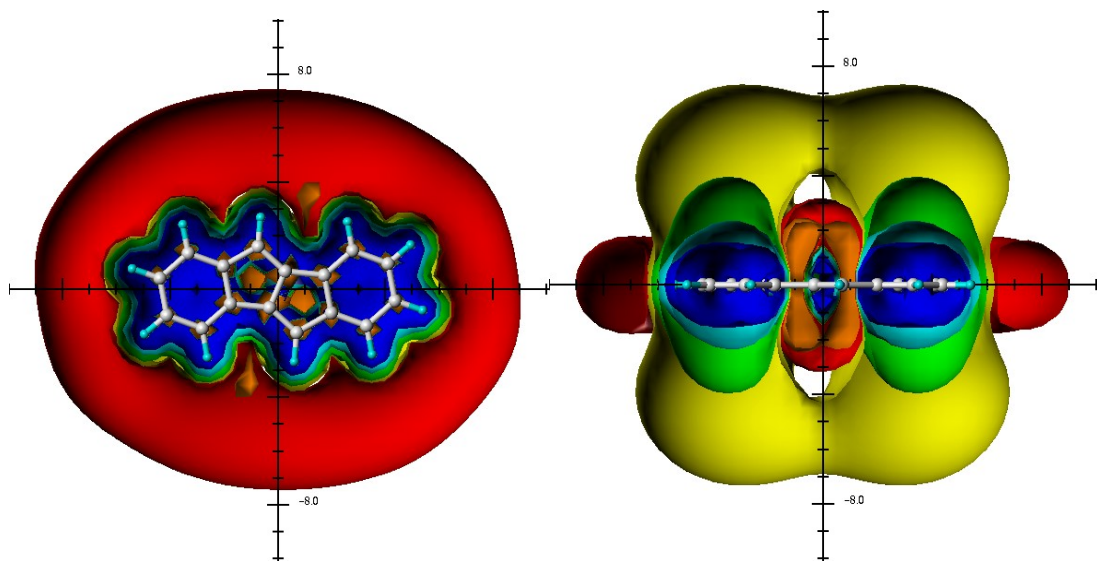

10:

13

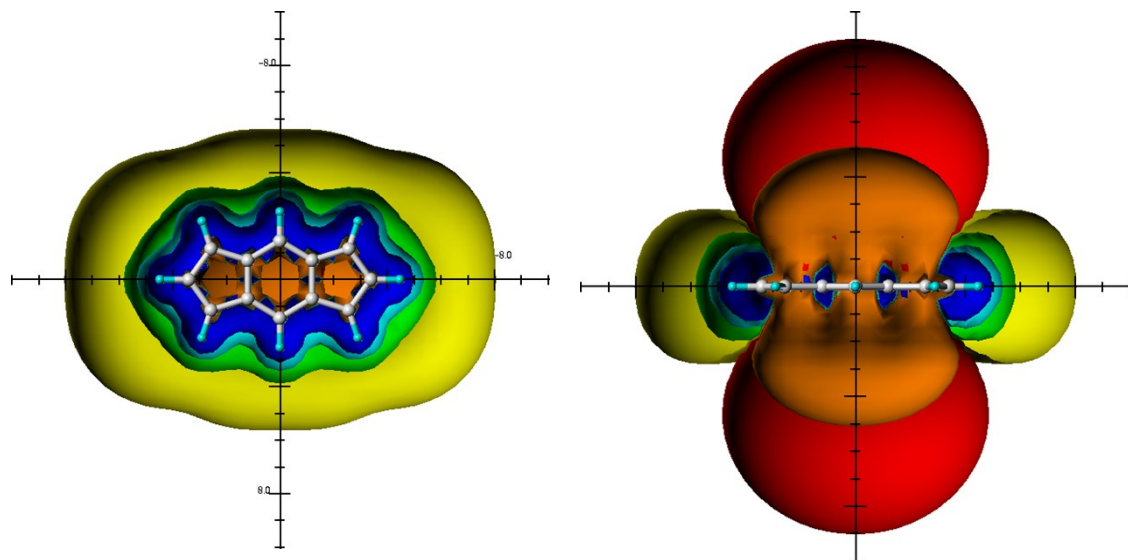

14

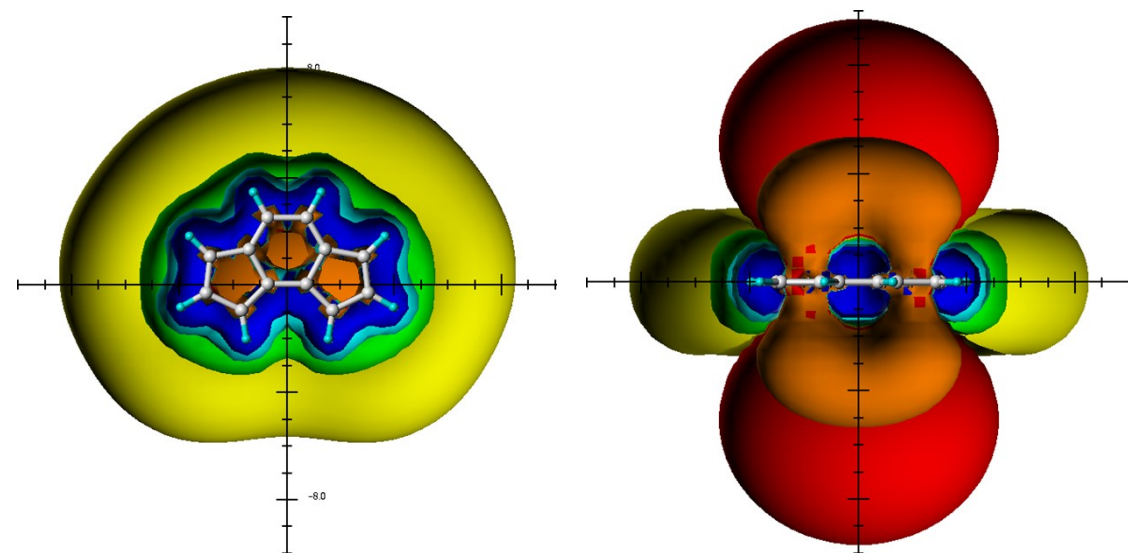

11:

15

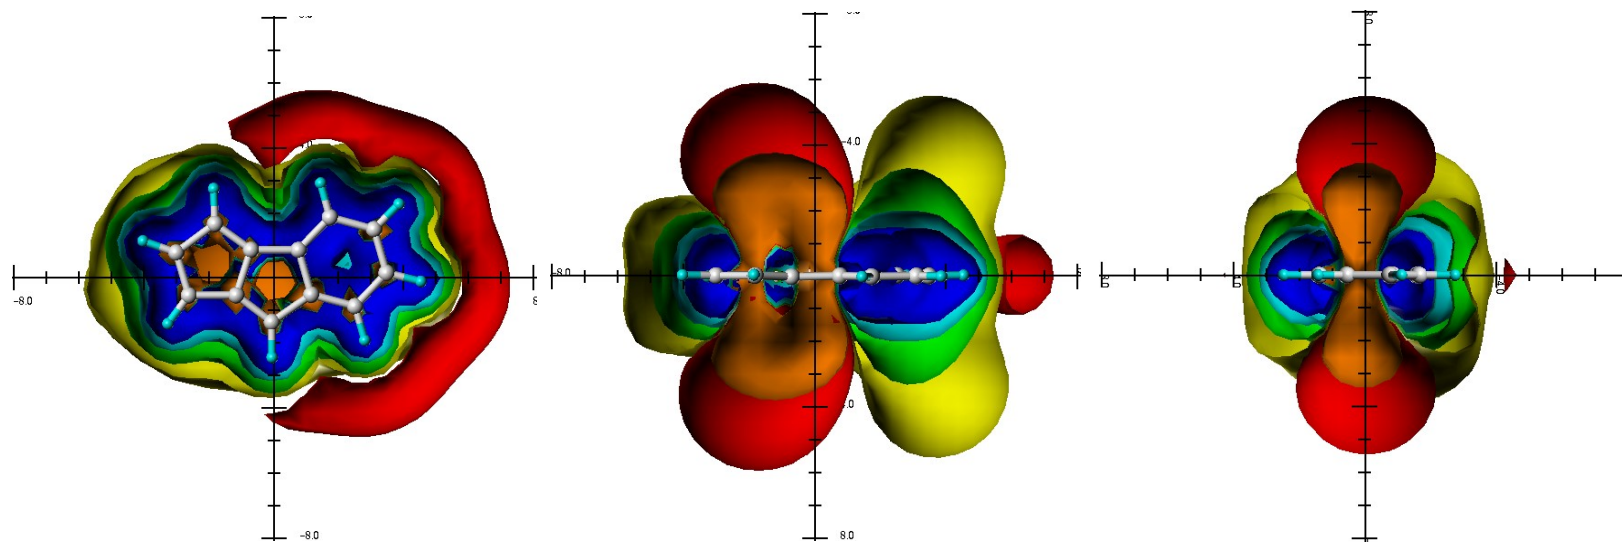

12:

16

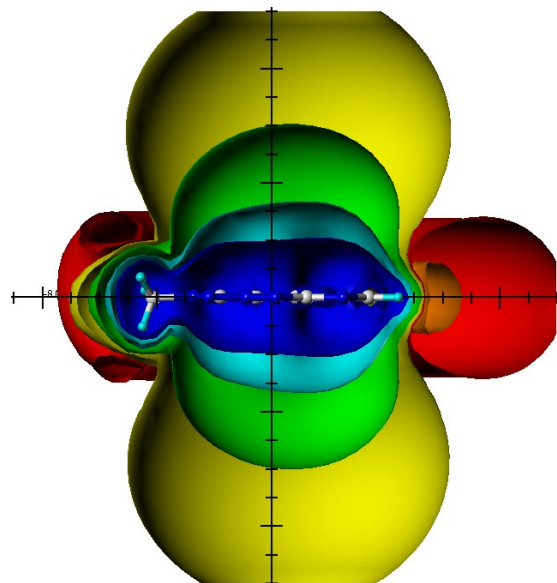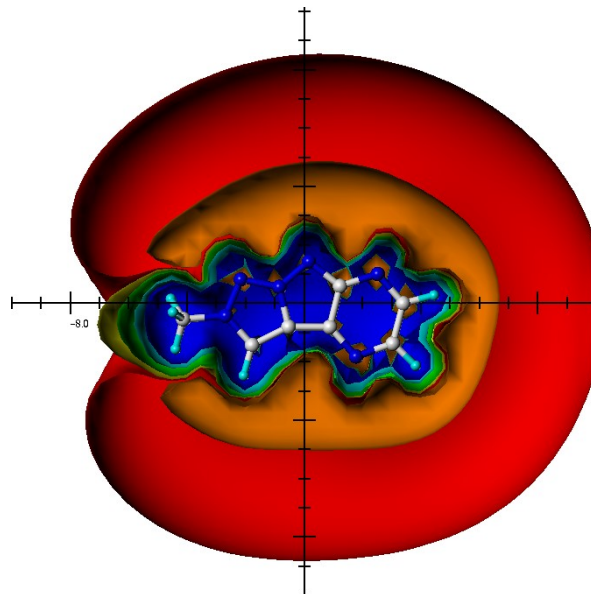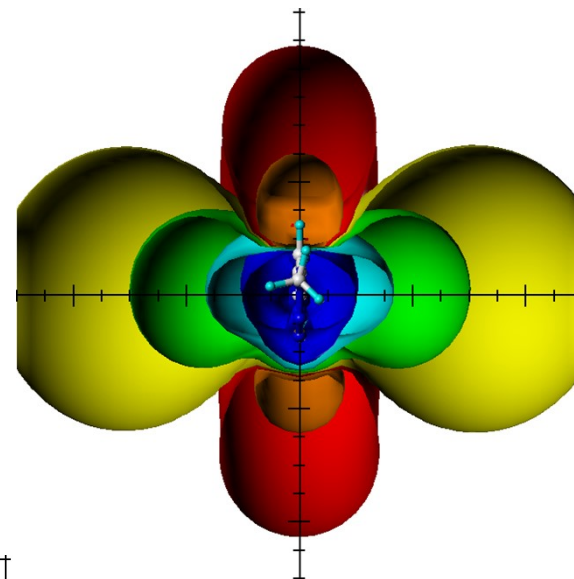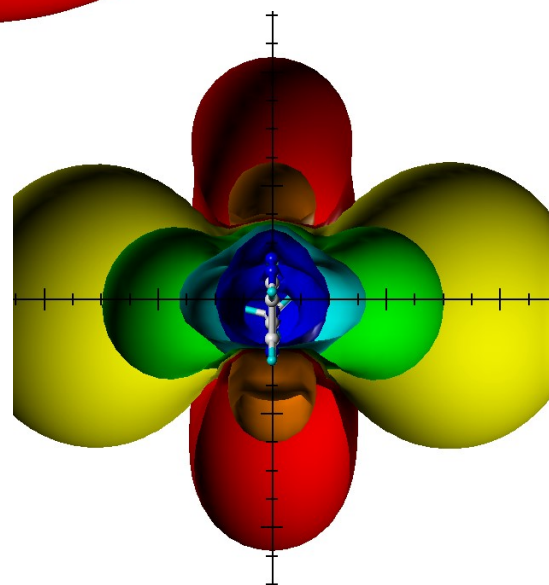



13:

17

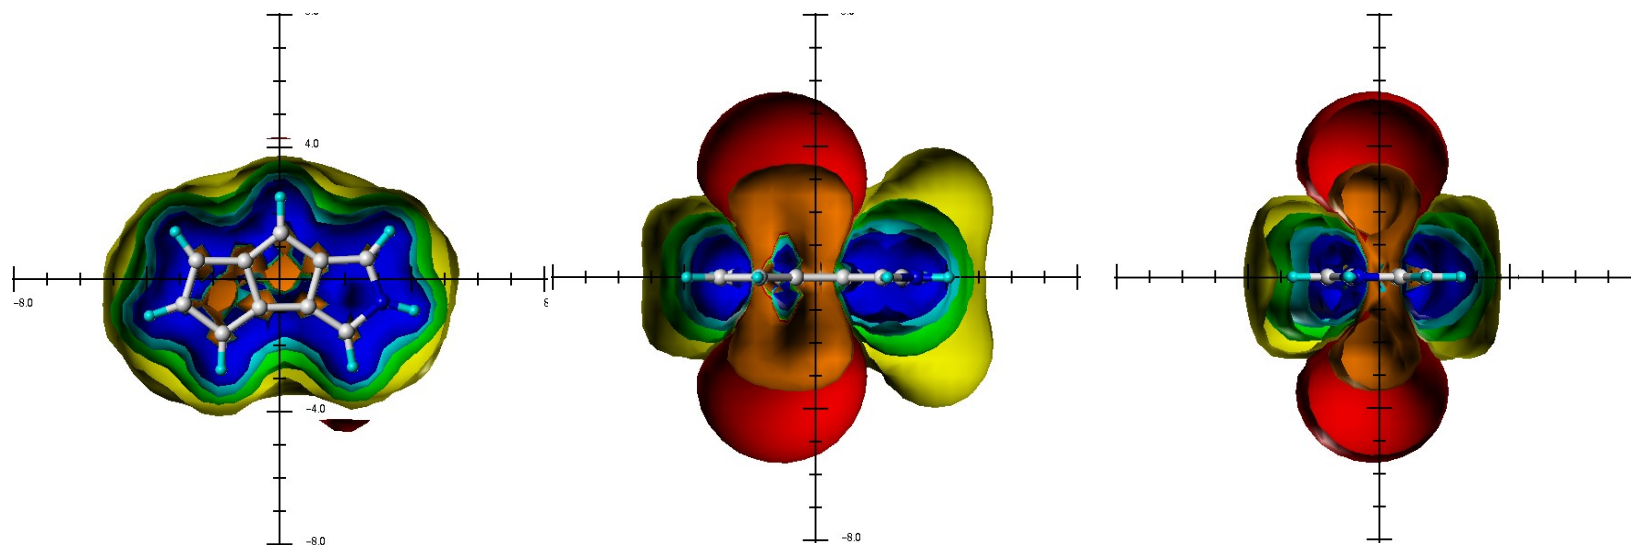

**Biphenylene 18**

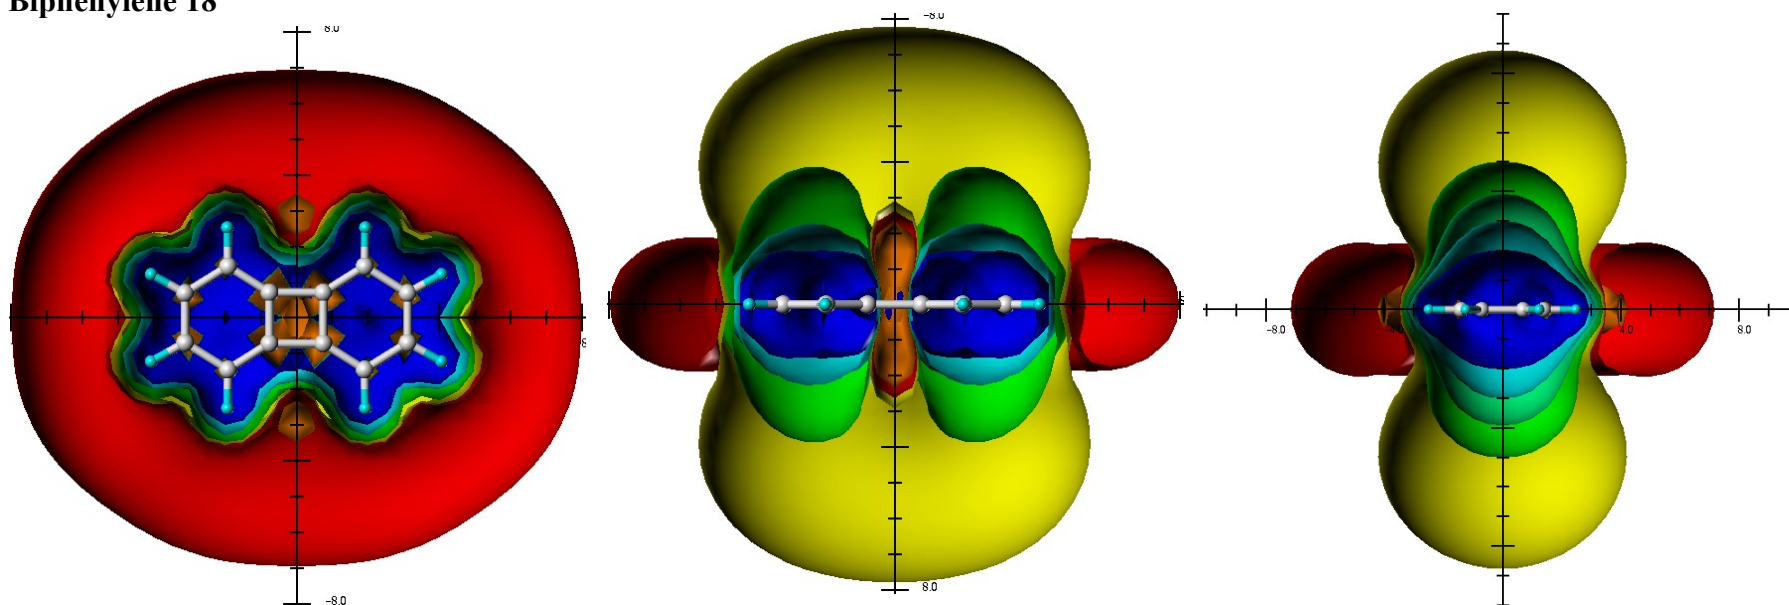

14:

Perylene 19

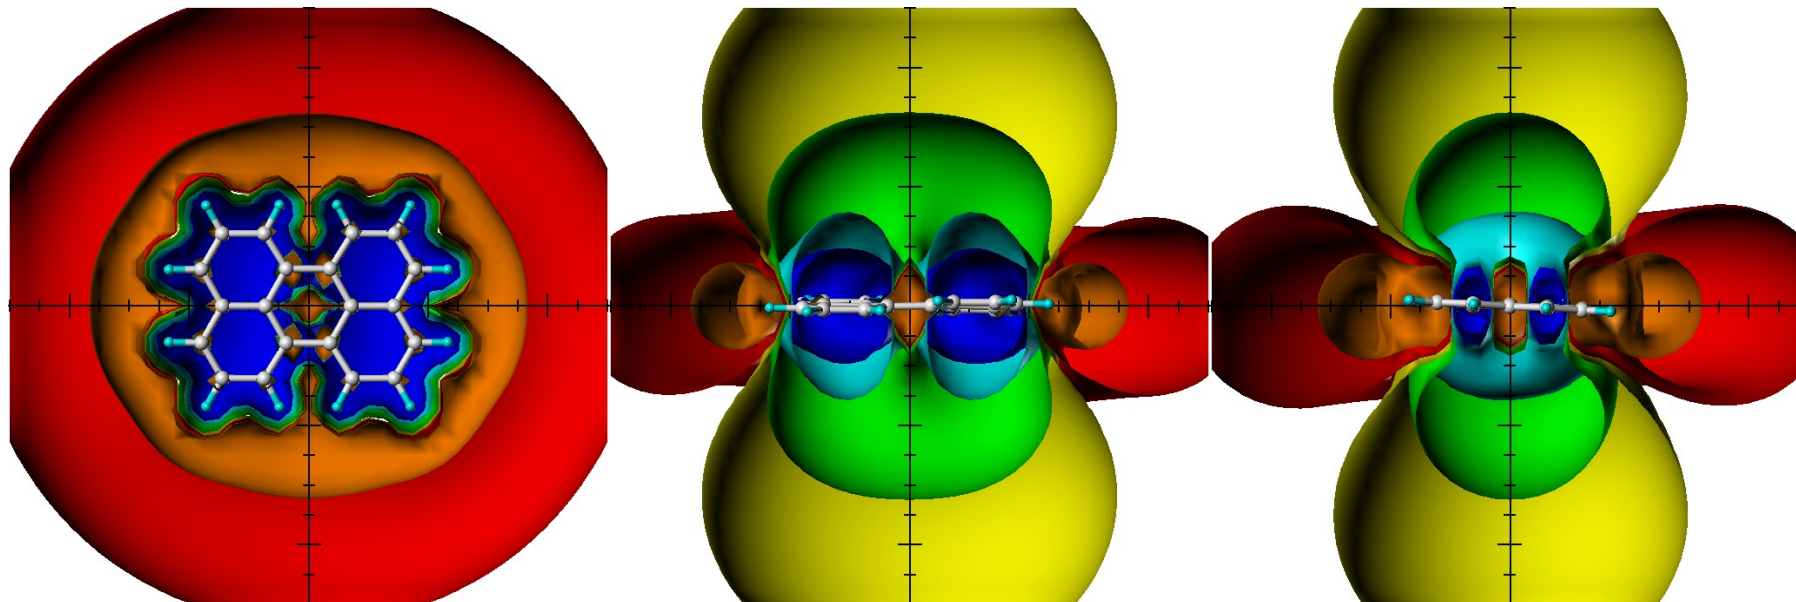

Pyrene 20

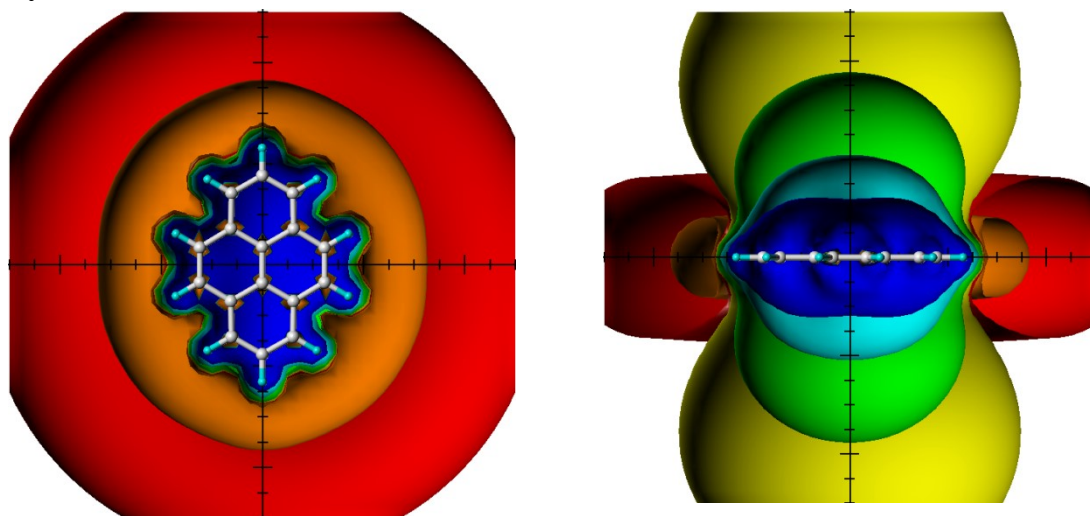

15:

21

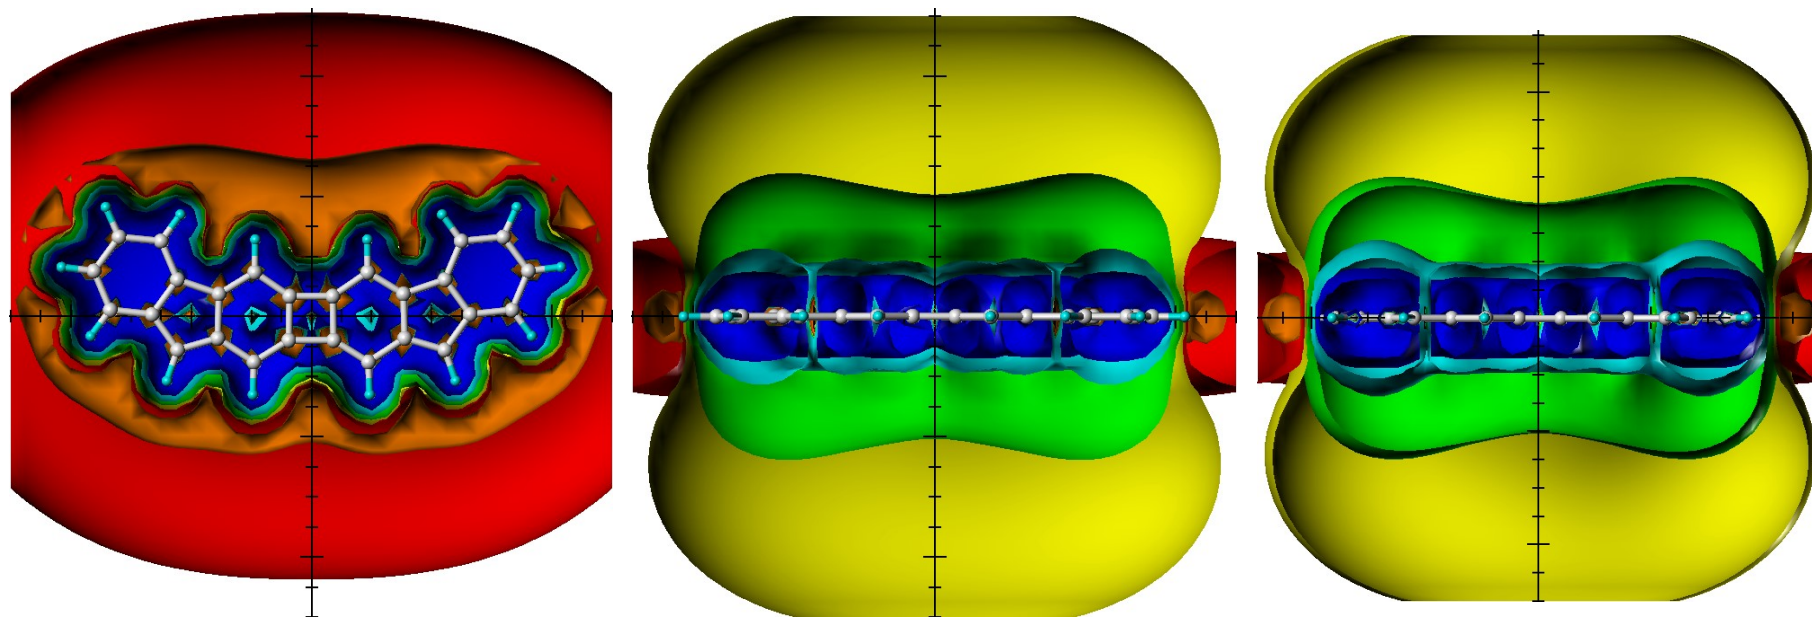



16:

22

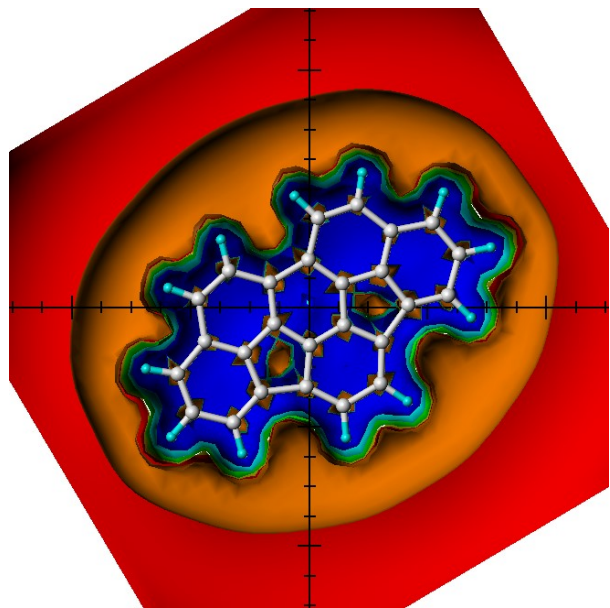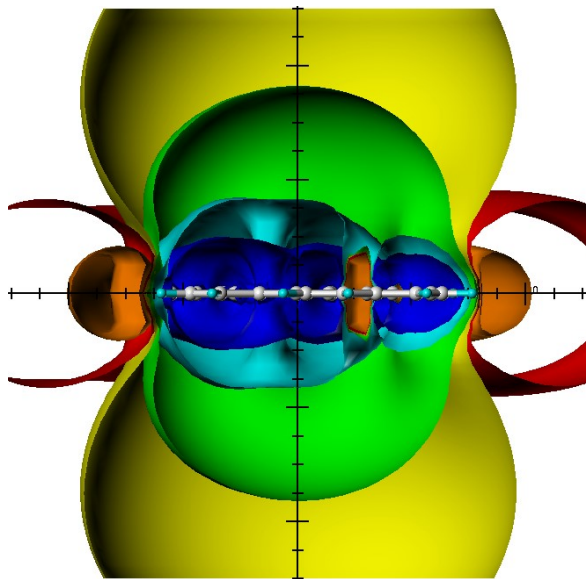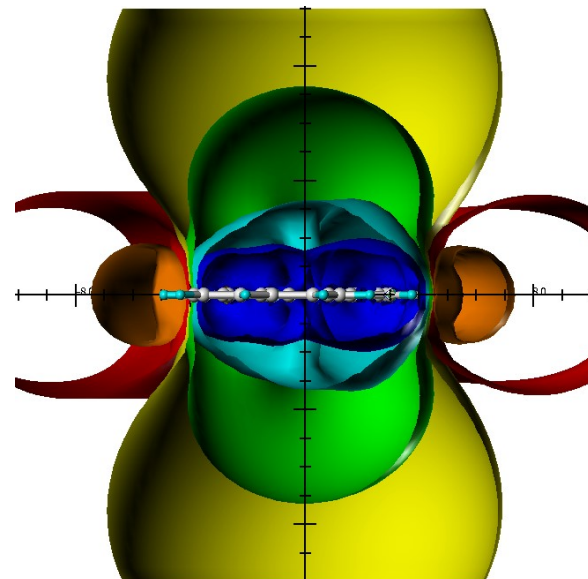



17:

*Cyclopropenylum cation*

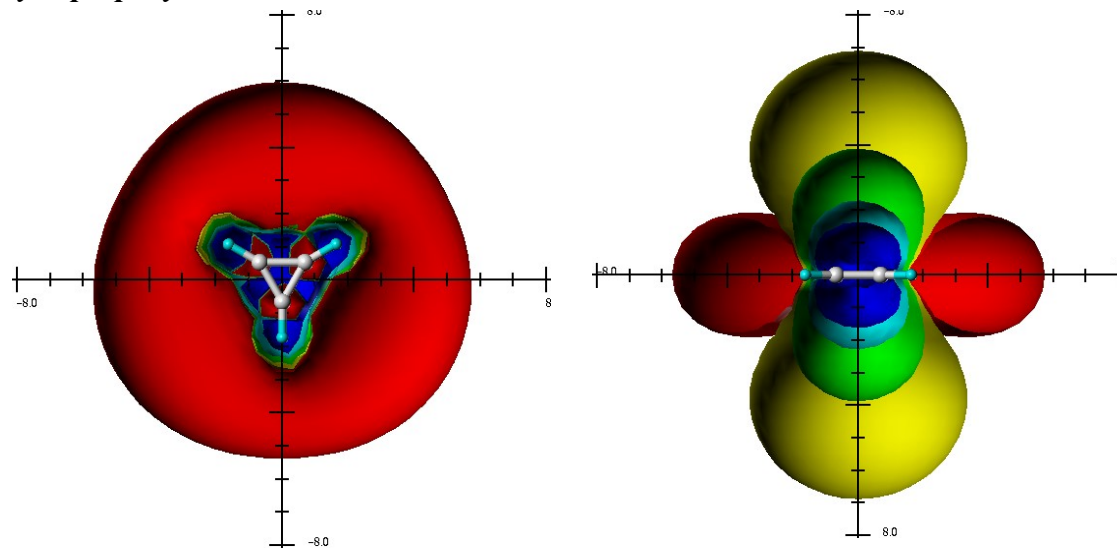

*Cyclopentadienylum cation*

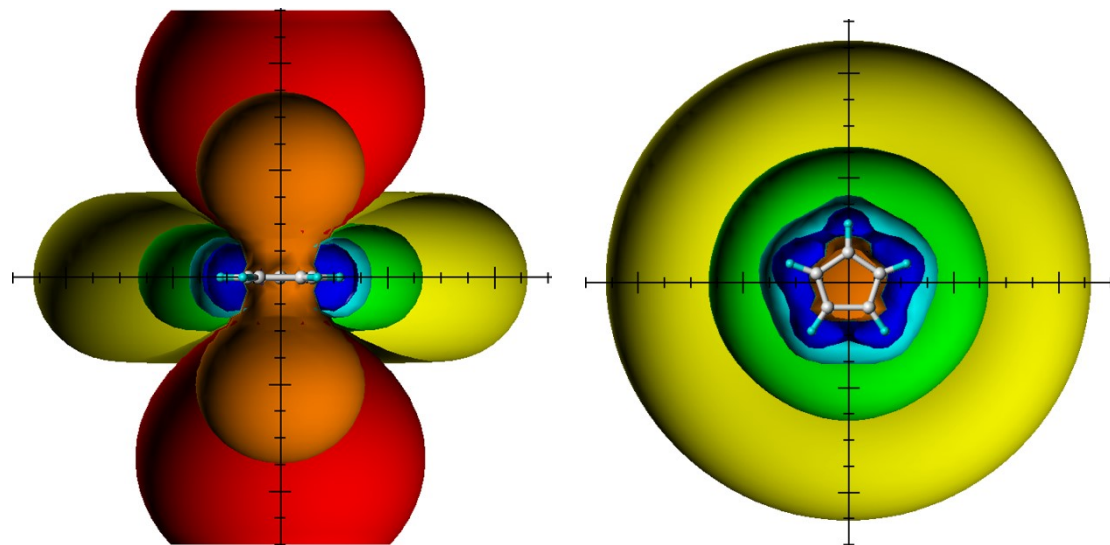

18:

*Benzene*

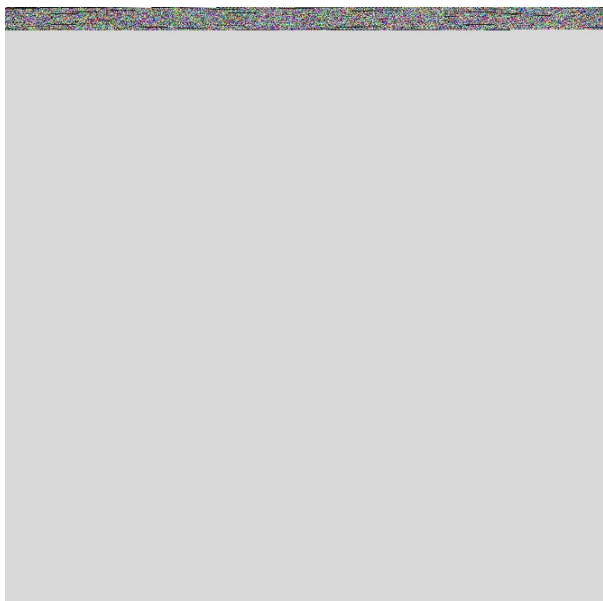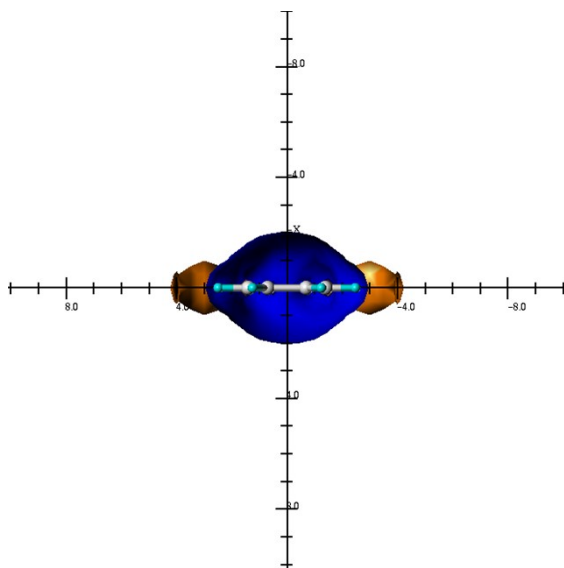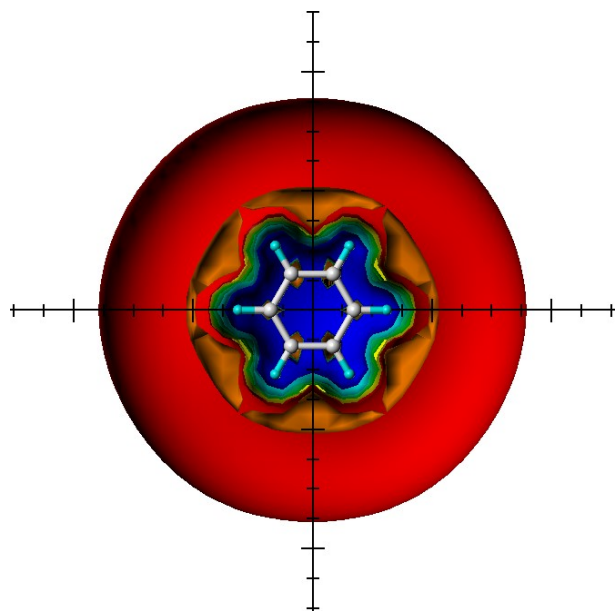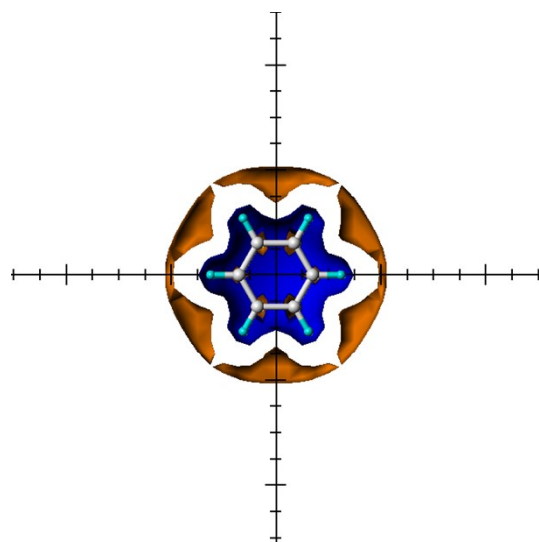

*Naphthalene*

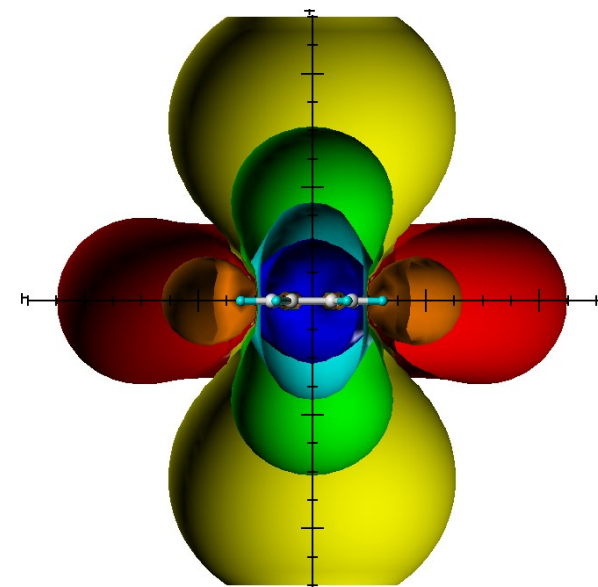

19:

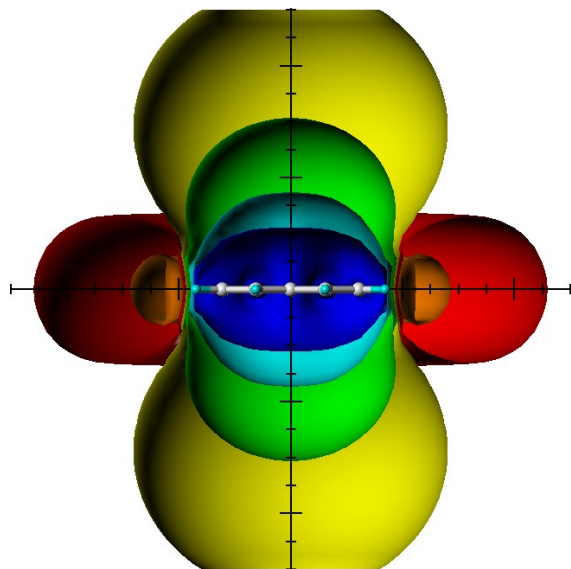

Supplement: d4ob00114a1.pdf [file d4ob00114a1.pdf]
